# Supplementary material for: Effects of a long-short axis skeleton on the excited-state properties of ultraviolet hot exciton molecules: luminescence mechanism and molecular design
Source: Royal Society of Chemistry journal article supplement (doi:10.1039/d2cp02824g), 2022-01-01

Supporting Information

PCCP

## Effects of long-short axis skeleton on excited-state properties of ultraviolet hot exciton molecules: luminescence mechanism and molecular design

Xinnan Jiang,<sup>a</sup> Jiao Wang,<sup>a</sup> Tingdong Liang,<sup>a</sup> Yuyu Pan,<sup>\*a</sup> Bing Yang<sup>b</sup>

<sup>a</sup>School of Petrochemical Engineering, Shenyang University of Technology, 30 Guanghua Street, Liaoyang, 111003, P. R. China;

<sup>b</sup>State Key Laboratory of Supramolecular Structure and Materials, Jilin University, Changchun, 130012, P. R. China.

Tel: +86 15140996671;

E-mail: panyu0422@sut.edu.cn

### Contents

**S1:** 2Cz-CNCz, 2BuCz-CNCz, 2TPA-CNCz, 2Na-CNCz, and 2An-CNCz in solid phase was obtained from all-atom molecular dynamics simulations.

**S2:** Cluster analysis for the last 10ns of the simulation process for 2Cz-CNCz, 2BuCz-CNCz, 2TPA-CNCz, 2Na-CNCz and 2An-CNCz.

**S3:** Geometric deviation and RMSD values for 2Cz-CNCz, 2BuCz-CNCz, 2TPA-CNCz, 2Na-CNCz and 2An-CNCz between S<sub>0</sub> and S<sub>1</sub> in solid phase.

**S4:** Intermolecular interactions for several dimers described by the IGM method of 2Cz-CNCz, 2BuCz-CNCz, 2TPA-CNCz, 2Na-CNCz and 2An-CNCz.

**S5:** Intermolecular Interaction Energy Including Electronic, Repulsion, and Dispersion Interactions in several dimers extracted from the film structure

**S6:** The transition properties of dimers which with the strongest interaction energy.

**S7:** Adiabatic vertical excitation energies of the first five singlet and triplet states of the 2Cz-CNCz, 2BuCz-CNCz, 2TPA-CNCz, 2Na-CNCz and 2An-CNCz molecule in solid phase.

**S8 :** Oscillator strength of S<sub>1</sub> state, spin-orbit coupling constants (cm<sup>-1</sup>) between S<sub>1</sub> and T<sub>2</sub> or T<sub>3</sub>, radiative and nonradiative rates (s<sup>-1</sup>) from S<sub>1</sub> to S<sub>0</sub> as well as the ISC and RISC Rates (s<sup>-1</sup>) between S<sub>1</sub> and T<sub>2</sub> or T<sub>3</sub> in solid phase.

**S9:** The reorganization energy versus the normal mode frequencies in the solvents and aggregation states.

**S1:** 2Cz-CNCz (a), 2BuCz-CNCz (b), 2TPA-CNCz (c), 2Na-CNCz (d), and 2An-CNCz (e) in solid phase was obtained from all-atom molecular dynamics simulations.

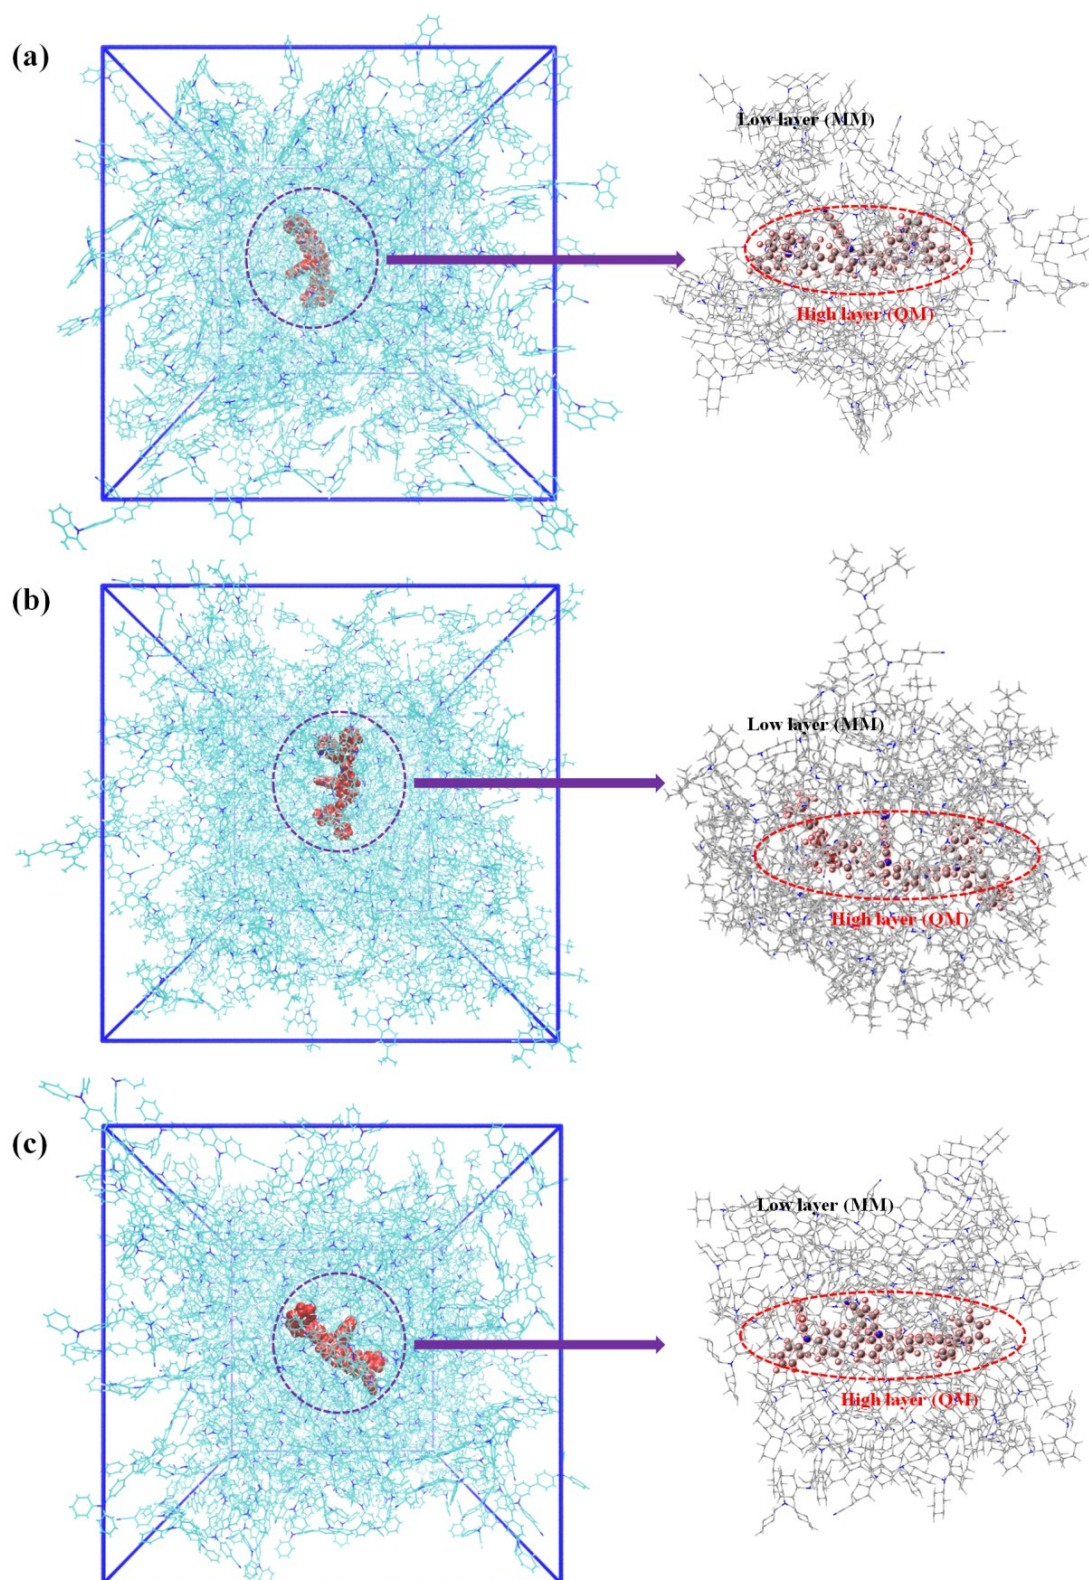

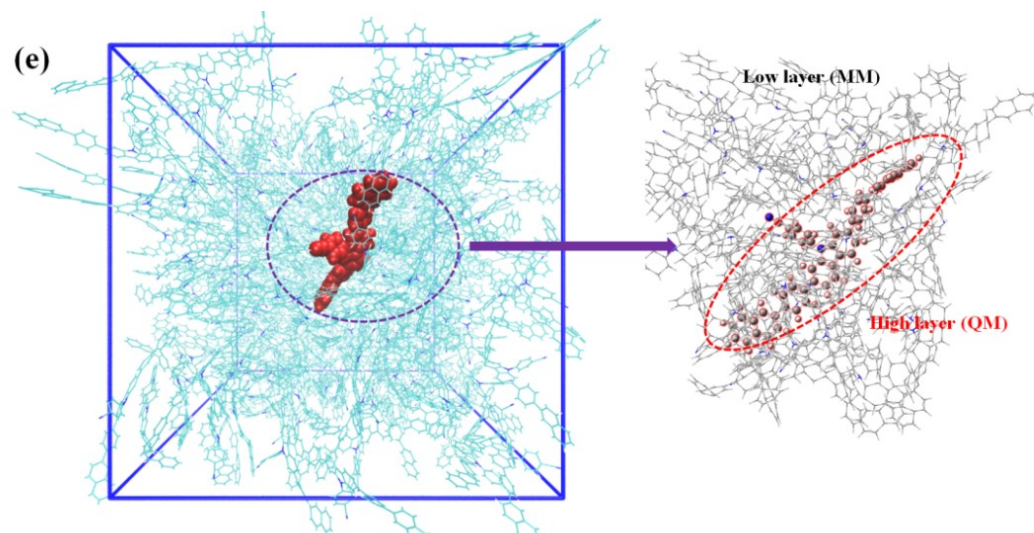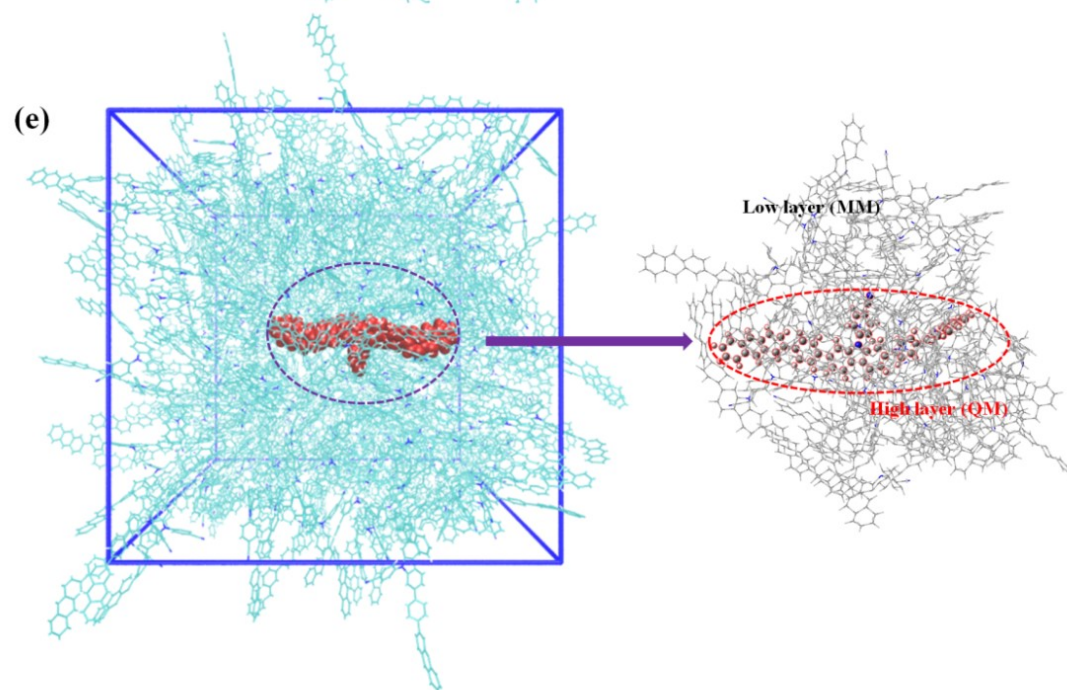

**S2:** Cluster analysis for the last 10ns of the simulation process for (a) 2Cz-CNCz, (b) 2BuCz-CNCz, (c) 2TPA-CNCz, (d) 2Na-CNCz and (e) 2An-CNCz.

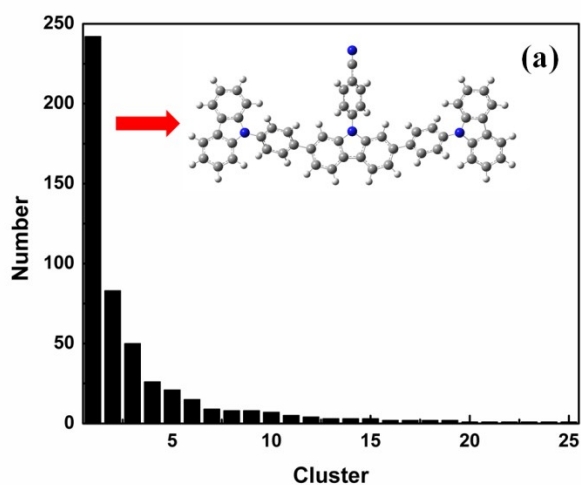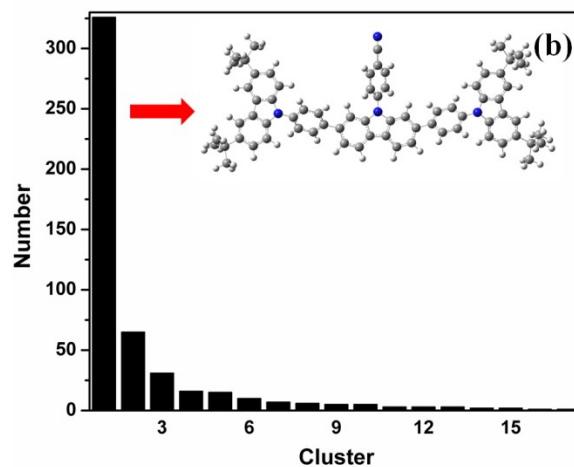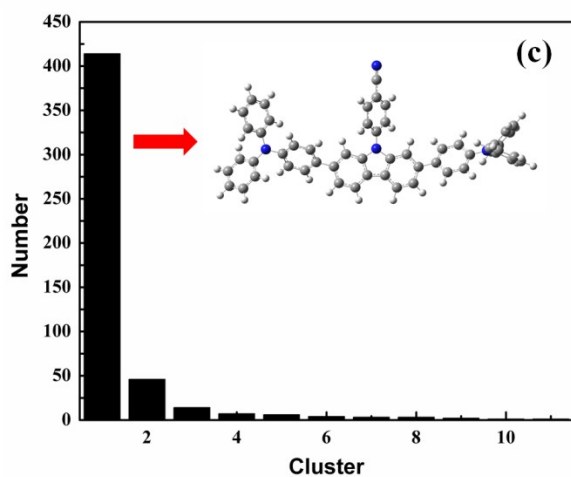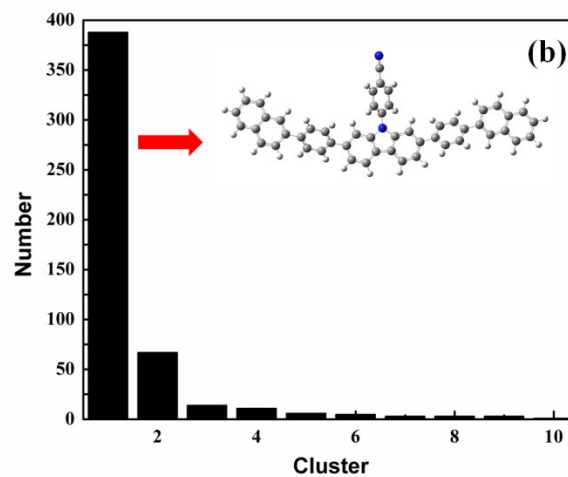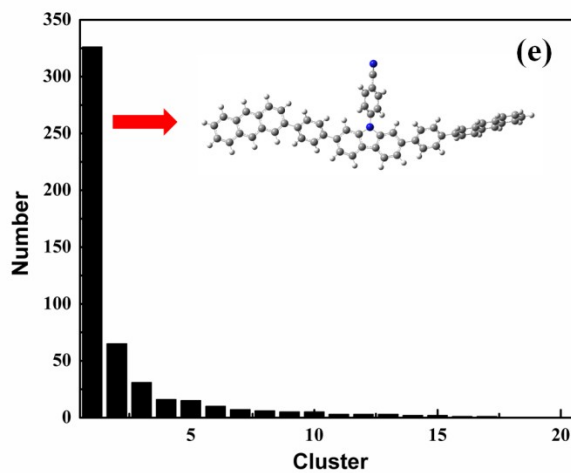



**S3:** Geometric deviation and RMSD values for 2Cz-CNCz, 2BuCz-CNCz, 2TPA-CNCz, 2Na-CNCz and 2An-CNCz between  $S_0$  and  $S_1$  in solid phase.

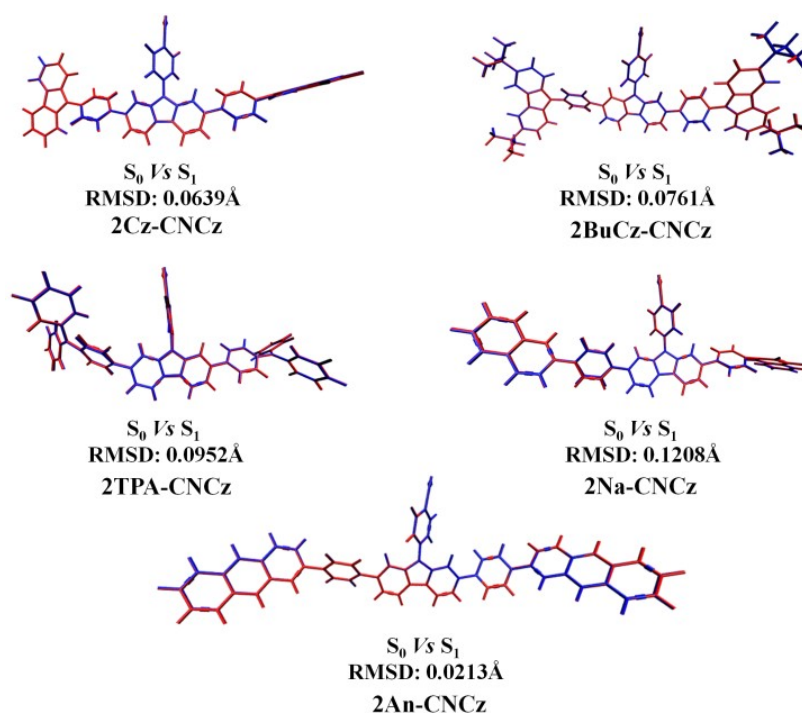

**S4:** Intermolecular interactions for several dimers described by the IGM method of 2Cz-CNCz, 2BuCz-CNCz, 2TPA-CNCz, 2Na-CNCz and 2An-CNCz.

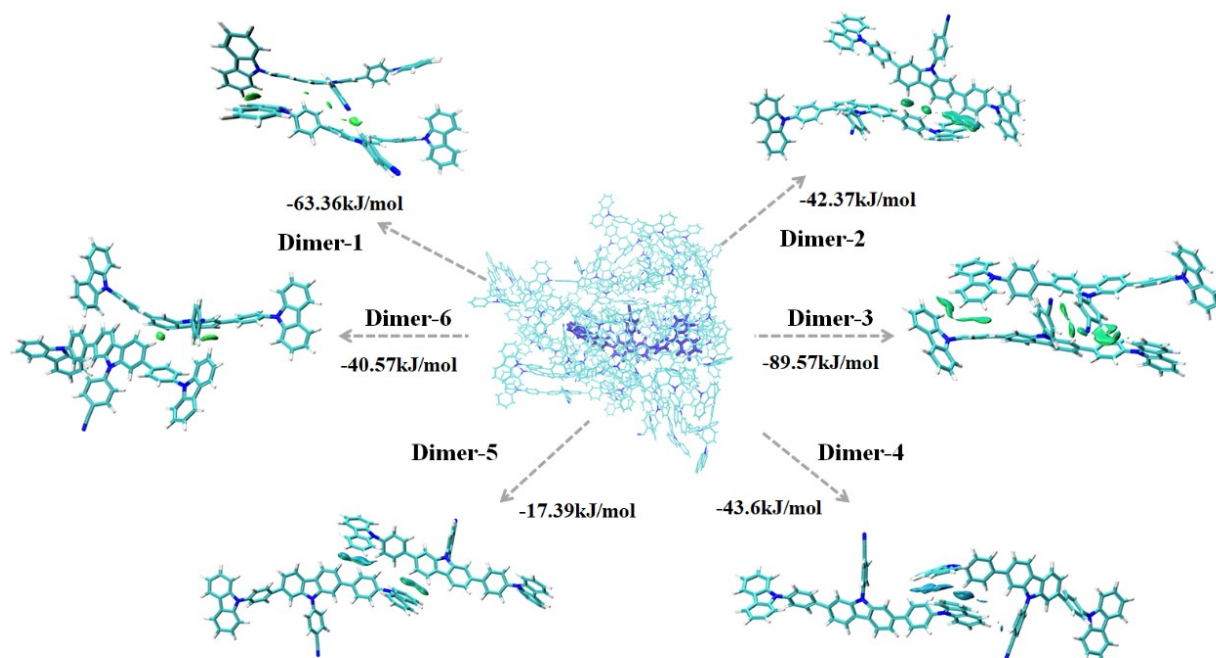

Intermolecular interactions for several dimers described by the IGM method of 2Cz-CNCz.

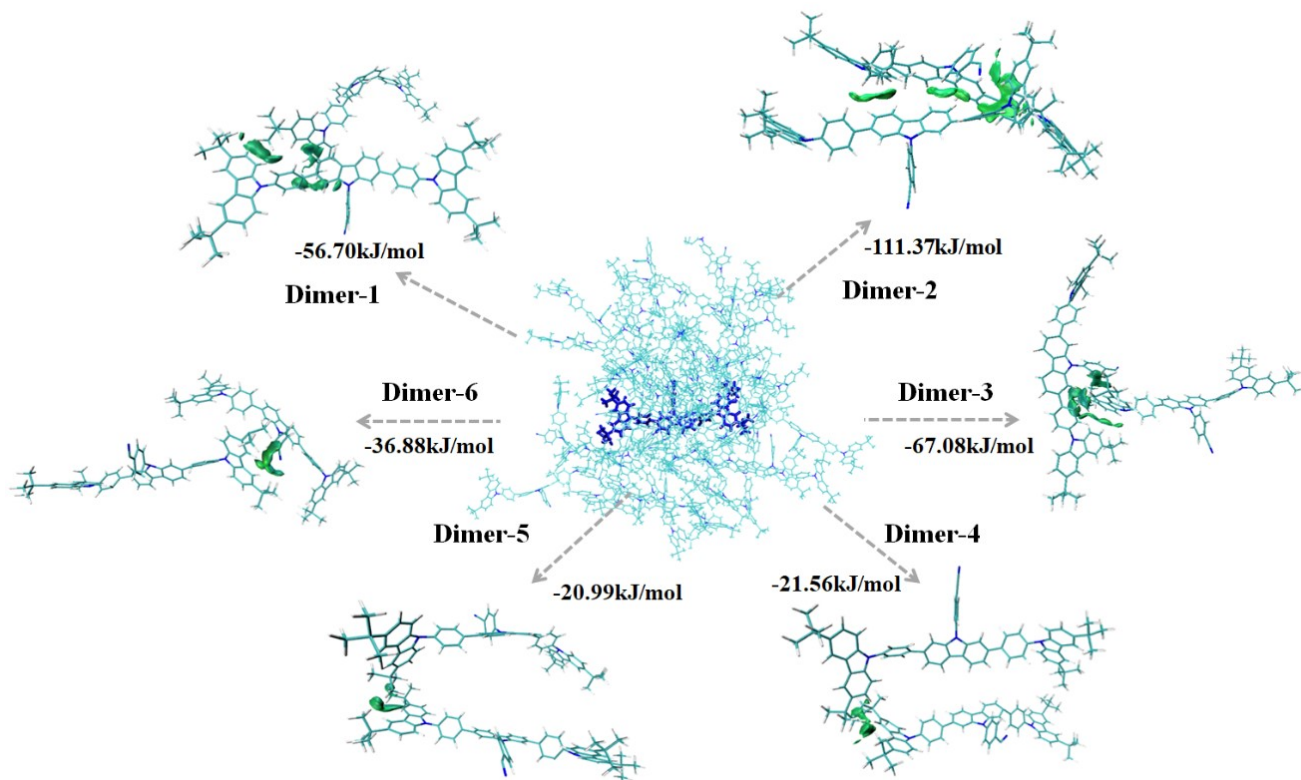

Intermolecular interactions for several dimers described by the IGM method of 2BuCz-CNCz.

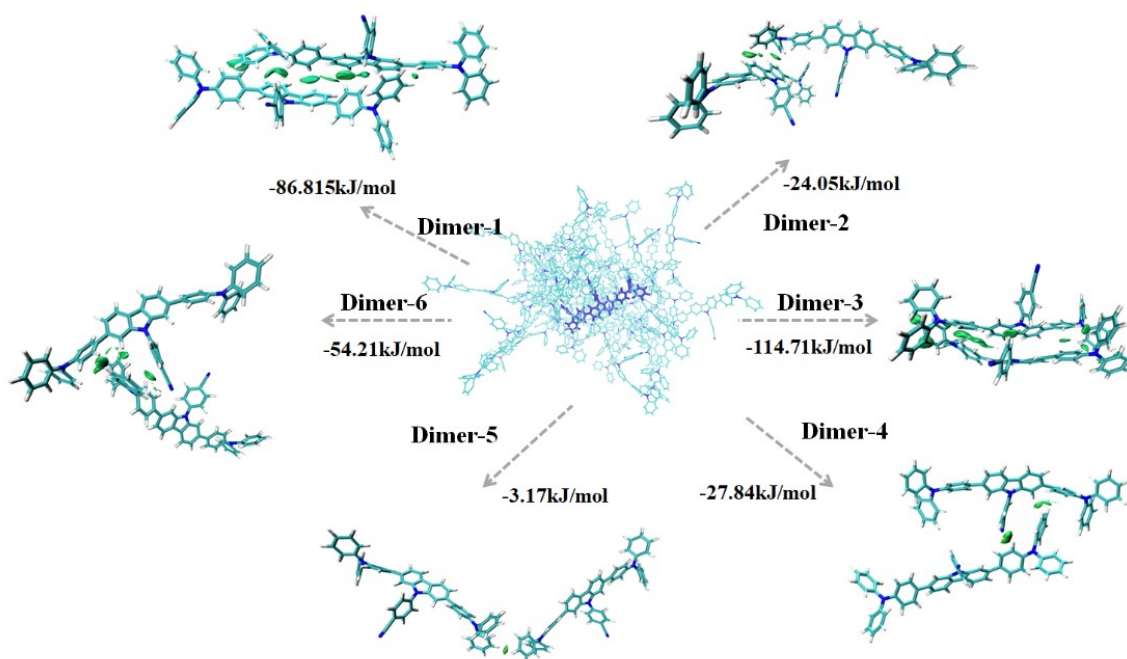

Intermolecular interactions for several dimers described by the IGM method of 2TPA-CNCz.

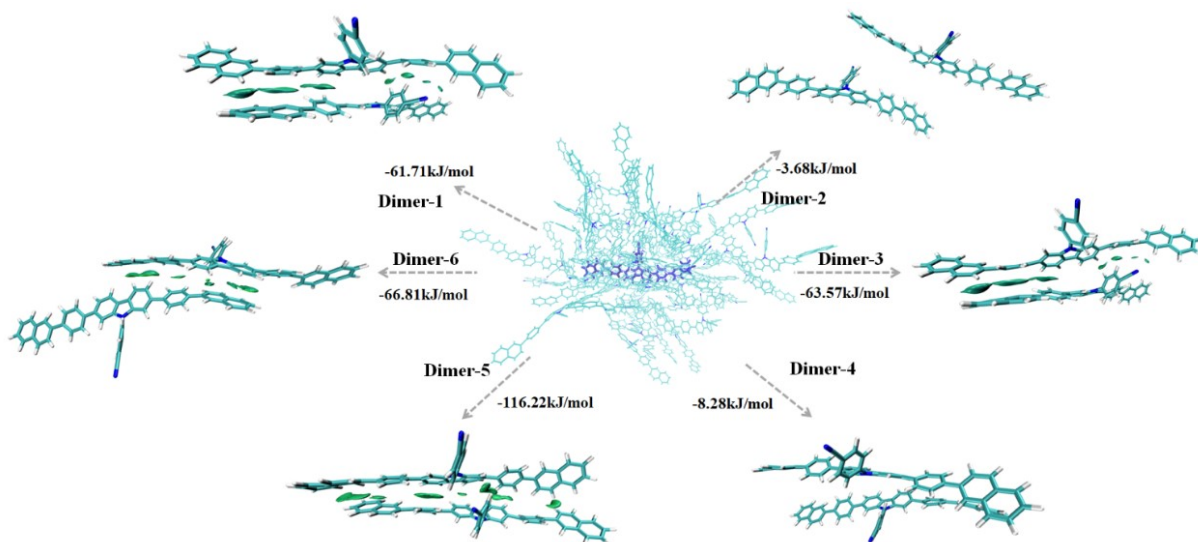

Intermolecular interactions for several dimers described by the IGM method of 2Na-CNCz.

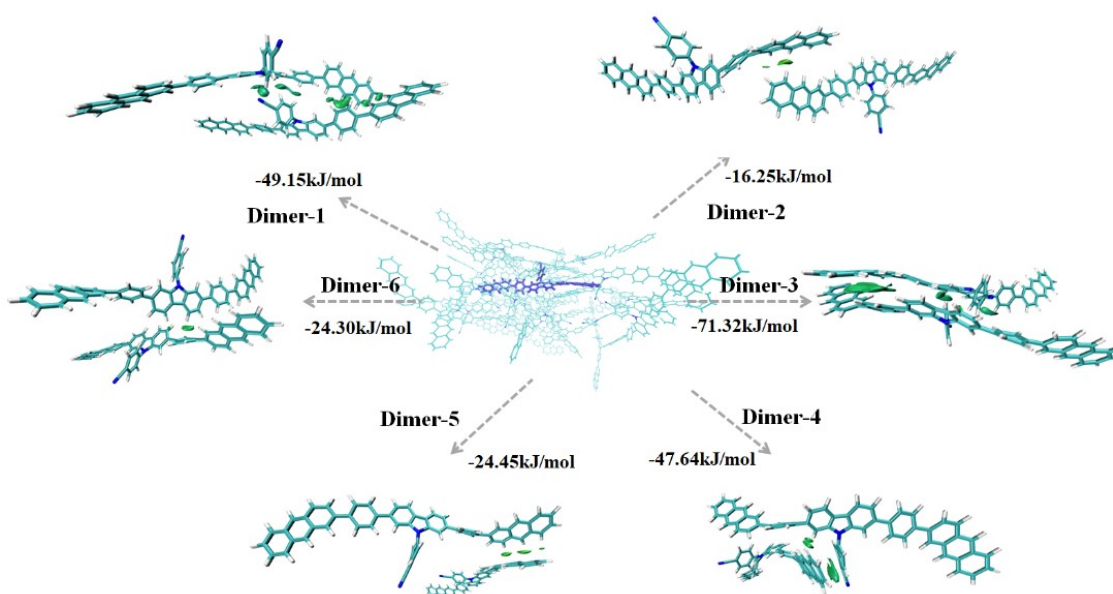

Intermolecular interactions for several dimers described by the IGM method of 2An-CNCz.

**S5:** Intermolecular Interaction Energy Including Electronic, Repulsion, and Dispersion Interactions in several dimers extracted from the film structure

| 2Cz-CNCz   | Electrostatic | Repulsion | Dispersion | Total   |
|------------|---------------|-----------|------------|---------|
| Dimer-1    | -7.75         | 21.12     | -76.73     | -63.36  |
| Dimer-2    | -5.23         | 47.32     | -84.46     | -42.37  |
| Dimer-3    | -6.67         | 55.89     | -138.79    | -89.57  |
| Dimer-4    | 1.55          | 49.72     | -94.87     | -43.6   |
| Dimer-5    | -6.17         | 40.64     | -51.86     | -17.39  |
| Dimer-6    | -1.06         | 11.44     | -39.27     | -28.9   |
| 2BuCz-CNCz | Electrostatic | Repulsion | Dispersion | Total   |
| Dimer-1    | 0.51          | 49.57     | -106.78    | -56.7   |
| Dimer-2    | -2.27         | 53.64     | -162.74    | -111.37 |
| Dimer-3    | -0.82         | 33.3      | -99.56     | -67.08  |
| Dimer-4    | 0.31          | 11.95     | -33.82     | -21.56  |
| Dimer-5    | 1.13          | 15.6      | -37.71     | -20.99  |
| Dimer-6    | -11.26        | 13.41     | -36.21     | -34.06  |
| 2TPA-CNCz  | Electrostatic | Repulsion | Dispersion | Total   |
| Dimer-1    | -3.08         | 49.87     | -133.6     | -86.81  |
| Dimer-2    | -1.5          | 19.1      | -41.65     | -24.05  |
| Dimer-3    | -3.66         | 88.42     | -199.47    | -114.71 |
| Dimer-4    | 8.23          | 15.88     | -51.96     | -27.84  |
| Dimer-5    | 0.51          | 3.95      | -7.64      | -3.17   |
| Dimer-6    | 2.38          | 37.1      | -93.68     | -54.21  |
| 2Na-CNCz   | Electrostatic | Repulsion | Dispersion | Total   |
| Dimer-1    | -2.37         | 64.49     | -123.83    | -61.71  |
| Dimer-2    | -0.62         | 0.01      | -3.07      | -3.68   |
| Dimer-3    | -2.37         | 64.49     | -123.83    | 61.71   |
| Dimer-4    | -1.51         | 0.08      | -6.85      | -8.28   |
| Dimer-5    | -4.72         | 88.77     | -200.27    | -116.22 |
| Dimer-6    | 6.82          | 56.3      | -130.02    | 66.81   |
| 2An-CNCz   | Electrostatic | Repulsion | Dispersion | Total   |
| Dimer-1    | -3.2          | 15.11     | -36.21     | -24.3   |
| Dimer-2    | -0.85         | 8.92      | -24.32     | -16.25  |
| Dimer-3    | 5.88          | 97.93     | -175.13    | -71.32  |
| Dimer-4    | -7.27         | 34.97     | -75.34     | -47.64  |
| Dimer-5    | -2.9          | 18.51     | -40.06     | -24.45  |
| Dimer-6    | -12.31        | 55.79     | -92.63     | -49.15  |

**S6:** The transition properties of dimers which with the strongest interaction energy.

We have performed excited state calculations for the dimer with larger interactions. The atomic labeling of the molecules has been illustrated in the figure below (left), and the transition density matrix is plotted on the right side of the figure, with the bright spots in the figure indicating the inter-atomic transitions. The calculations reveal that all the dimer transitions in the figure occur on a single molecule.



(a)

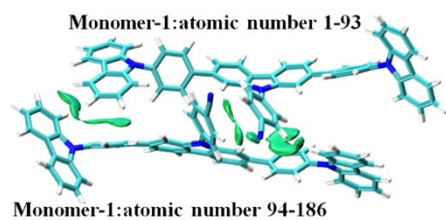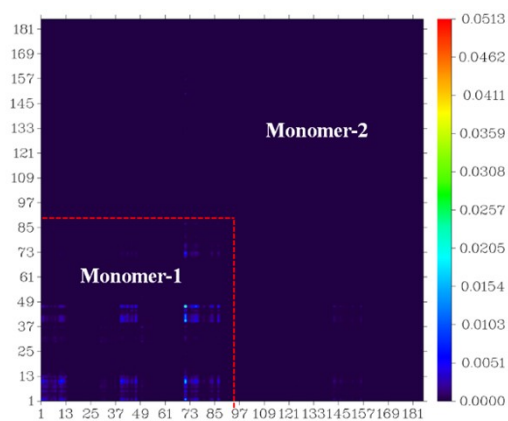

(a)

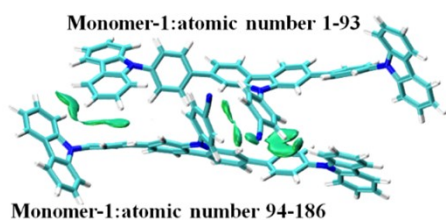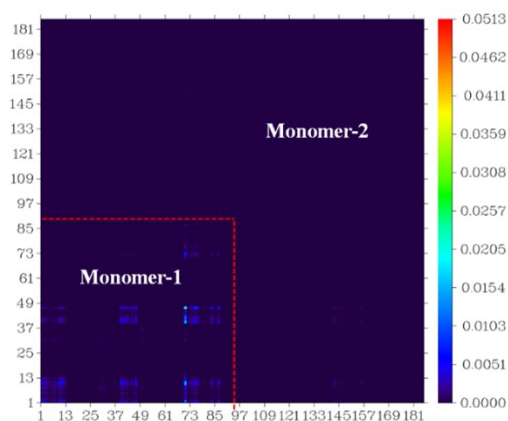

(c)

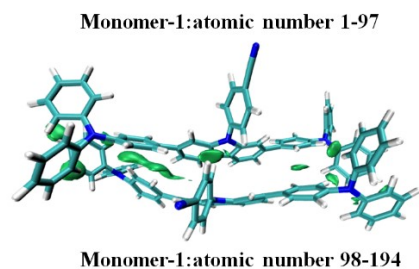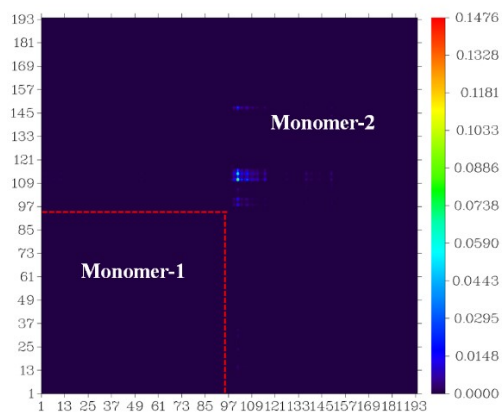

(d)

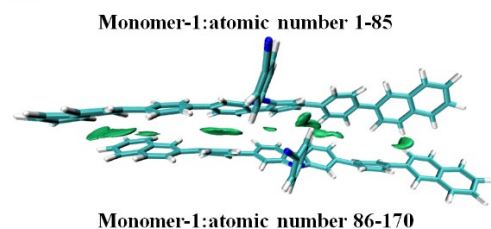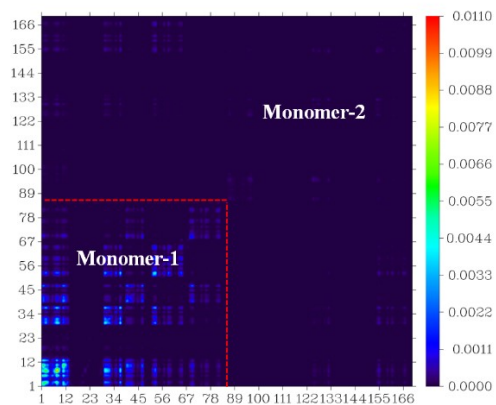

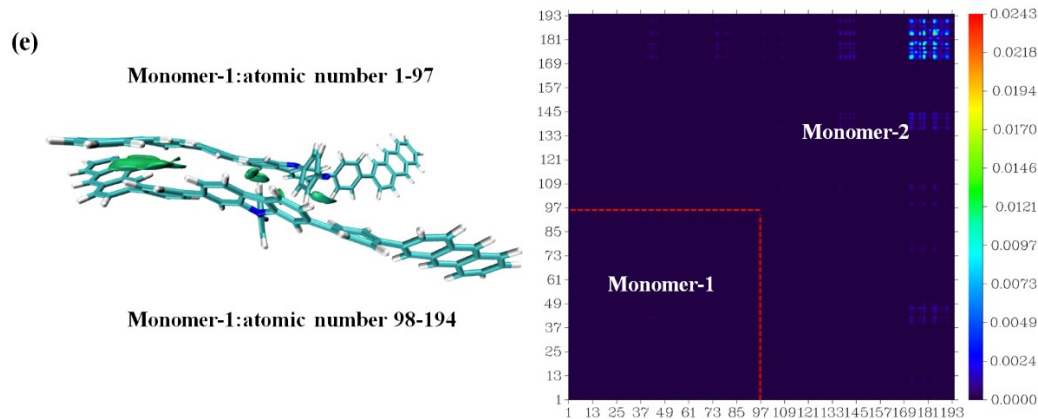

**S7:** Adiabatic vertical excitation energies of the first five singlet and triplet states of the 2Cz-CNCz, 2BuCz-CNCz, 2TPA-CNCz, 2Na-CNCz and 2An-CNCz molecule in solid phase.

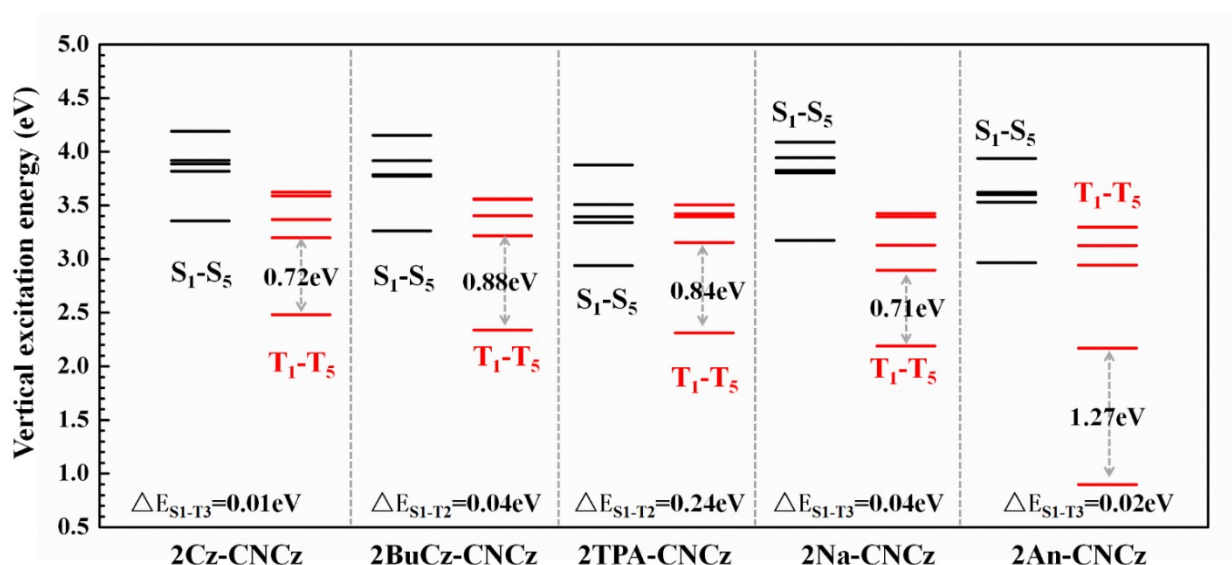

**S8:** Oscillator strength of  $S_1$  state, spin-orbit coupling constants ( $\text{cm}^{-1}$ ) between  $S_1$  and  $T_2$  or  $T_3$ , radiative and nonradiative rates ( $\text{s}^{-1}$ ) from  $S_1$  to  $S_0$  as well as the ISC and RISC Rates ( $\text{s}^{-1}$ ) between  $S_1$  and  $T_2$  or  $T_3$  in solid phase.

|            | $f(S_1)$ | $k_r$              | $k_{nr}$              | $k_{ISC}$          | $k_{RISC}$         |
|------------|----------|--------------------|-----------------------|--------------------|--------------------|
| 2Cz-CNCz   | 2.4542   | $2.11 \times 10^8$ | $9.99 \times 10^{10}$ | $3.13 \times 10^7$ | $9.31 \times 10^6$ |
| 2BuCz-CNCz | 2.4054   | $1.06 \times 10^8$ | $8.59 \times 10^9$    | $1.05 \times 10^7$ | $9.21 \times 10^6$ |
| 2TPA-CNCz  | 2.1634   | $8.72 \times 10^7$ | $6.92 \times 10^{11}$ | $3.76 \times 10^7$ | $2.65 \times 10^6$ |
| 2Na-CNCz   | 2.5162   | $1.69 \times 10^8$ | $9.99 \times 10^9$    | $3.99 \times 10^7$ | $1.16 \times 10^8$ |
| 2An-CNCz   | 0.1818   | $8.99 \times 10^7$ | $8.81 \times 10^9$    | $8.97 \times 10^7$ | $9.91 \times 10^7$ |

**S9:** The reorganization energy versus the normal mode frequencies in the solvents and aggregation states.

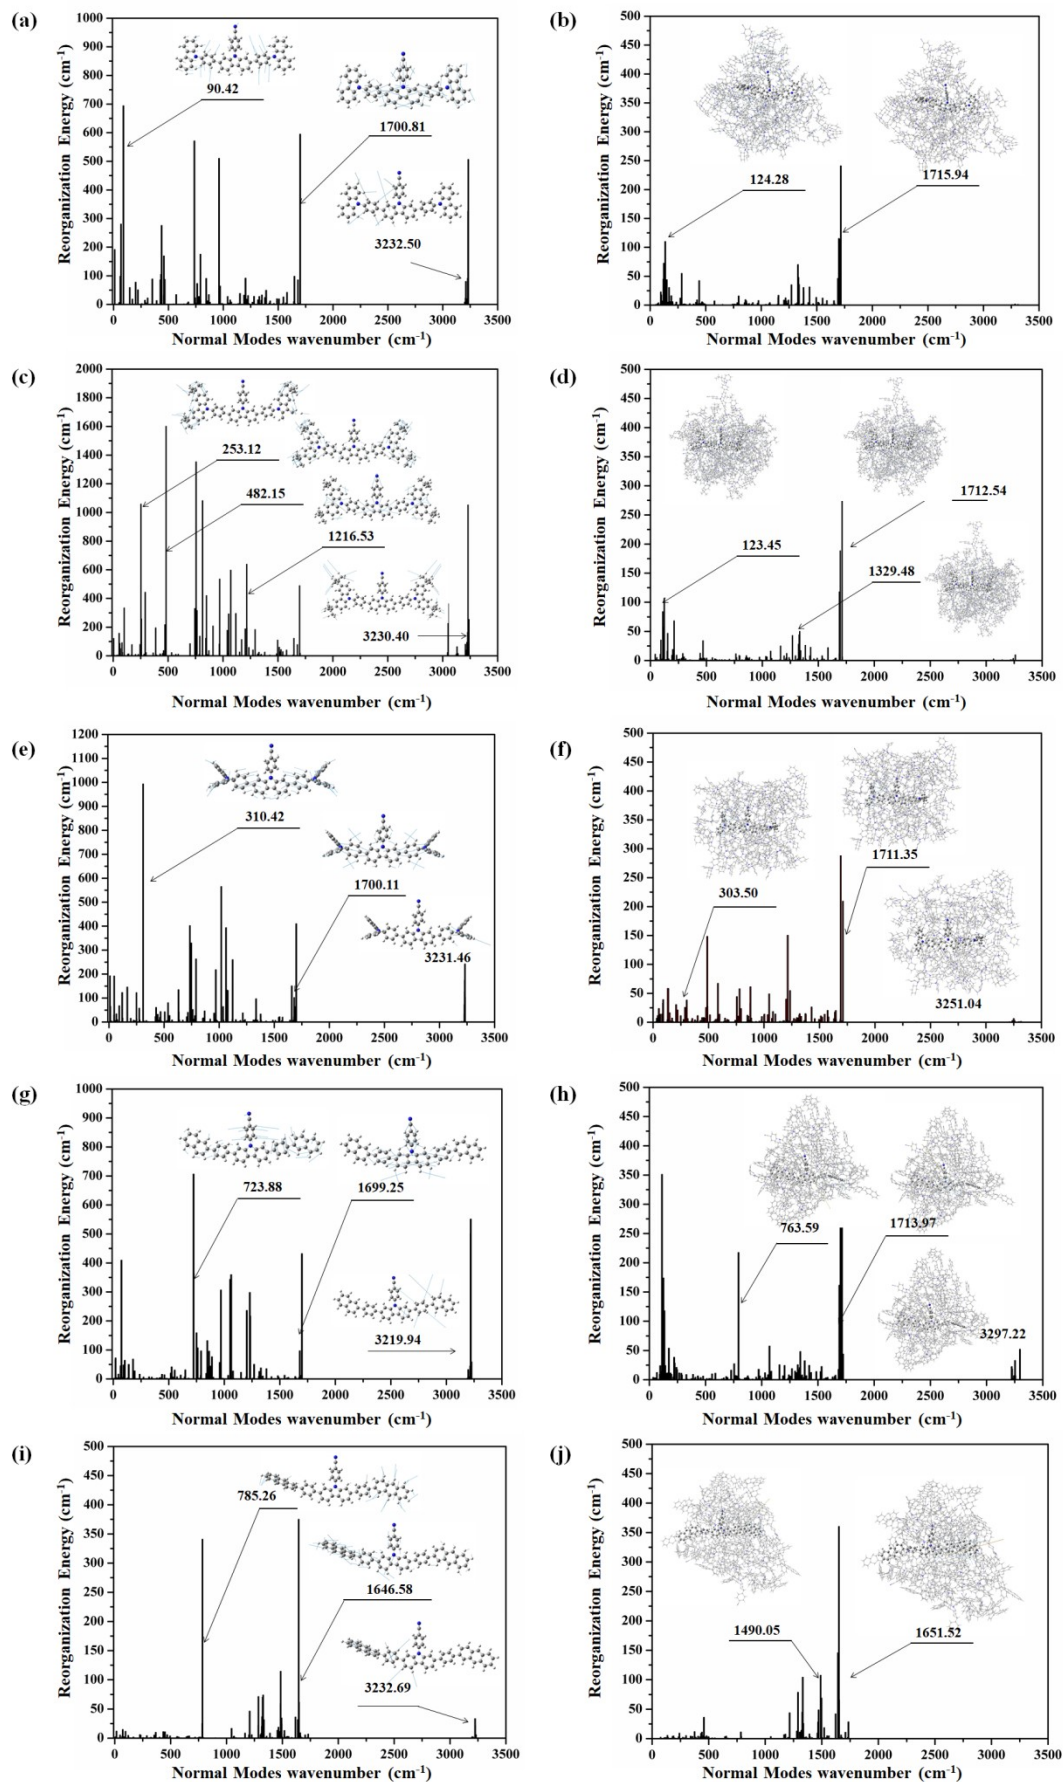

Supplement: d2cp02824g1.pdf [file d2cp02824g1.pdf]
